# Supplementary material
Source: PubMed Central journal article supplement (PMC5096552)
Supplement: NIHMS797582-supplement-Graphic_Abstract.pdf [file NIHMS797582-supplement-Graphic_Abstract.pdf]

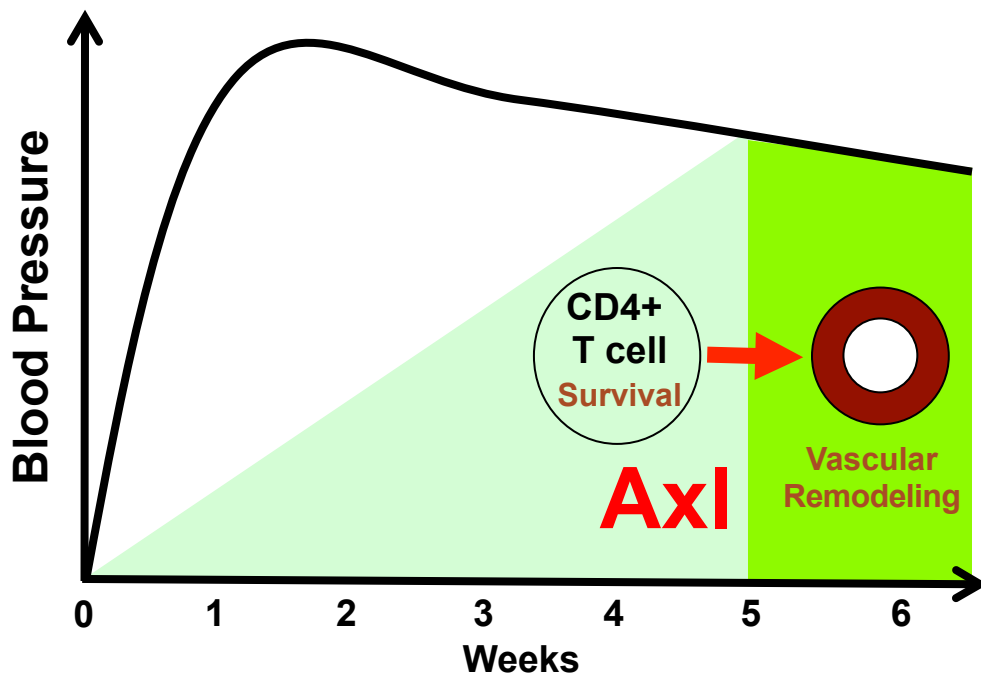

**A proposed model on the role of Axl on CD4<sup>+</sup> T cell survival in progression of salt-dependent hypertension.** Black line shows changes in blood pressure. X-axis represents time in weeks. Y-axis represents changes in blood pressure. Highlighted light green area shows a critical role for Axl in T lymphocyte survival in circulation that contribute to vascular remodeling and the late hypertension (lime color area, 5-6 weeks)
