# Supplementary material
Source: PubMed Central journal article supplement (PMC5096552)
Supplement: NIHMS797582-supplement-Supplemental_Materials.pdf [file NIHMS797582-supplement-Supplemental_Materials.pdf]

**Table I.** Analyses of the immune cells in spleens from Axl<sup>+/+</sup> and Axl<sup>-/-</sup> mice

| <b>Cell population</b>                                                                           | <b>% of Total Splenocytes</b> |                       |
|--------------------------------------------------------------------------------------------------|-------------------------------|-----------------------|
|                                                                                                  | <b>Axl+/+, %, n=3</b>         | <b>Axl-/-, %, n=3</b> |
| CD3 <sup>high</sup> /NK1.1 <sup>low</sup> ( <b>T cells</b> )                                     | 25.0 ± 0.5                    | 24.2 ± 1.7            |
| CD3 <sup>low</sup> /NK1.1 <sup>high</sup> ( <b>NK cells</b> )                                    | 5.2 ± 0.1                     | 5.0 ± 0.3             |
| Gated at NK1.1 <sup>+</sup> : CD3 <sup>high</sup> /NK1.1 <sup>high</sup> ( <b>NKT cells</b> )    | 22.1 ± 2.8                    | 22.3 ± 0.4            |
| Gated at CD4 <sup>+</sup> : CD62L <sup>high</sup> /CD44 <sup>low</sup> ( <b>naïve T cells</b> )  | 57.2 ± 0.1                    | 61.2 ± 1.3            |
| Gated at CD4 <sup>+</sup> : CD62L <sup>low</sup> /CD44 <sup>high</sup> ( <b>memory T cells</b> ) | 16.3 ± 0.5                    | 13.7 ± 0.5            |

Parameters are shown as mean ± SEM. n, Number per group.

**Table II.** Hematologic differences between wild type and Axl knockout mice

| <b>Parameter</b>                    | <b>Axl<sup>+/+</sup>, n=8</b> | <b>Axl<sup>-/-</sup>, n=7</b> |
|-------------------------------------|-------------------------------|-------------------------------|
| White blood cells, x10 <sup>9</sup> | 8.3 ± 0.6                     | 5.3 ± 0.7 *                   |
| Lymphocytes, x10 <sup>9</sup>       | 7.8 ± 0.6                     | 4.9 ± 0.6 *                   |
| Neutrophils, x10 <sup>9</sup>       | 0.35 ± 0.11                   | 0.22 ± 0.08                   |
| Monocytes, x10 <sup>9</sup>         | 0.21 ± 0.04                   | 0.13 ± 0.06                   |
| Red blood cells, x10 <sup>9</sup>   | 11.1 ± 0.3                    | 9.4 ± 1.2                     |
| Platelets, x10 <sup>9</sup>         | 445 ± 66                      | 449 ± 71                      |
| Hematocrit, %                       | 44 ± 3                        | 40 ± 3                        |
| Hemoglobin, g/dL                    | 14.5 ± 0.7                    | 11.6 ± 0.8 *                  |
| Plateletcrit, %                     | 0.33 ± 0.08                   | 0.39 ± 0.08                   |
| Mean corpuscular volume             | 43 ± 1                        | 44 ± 1                        |
| Mean corpuscular hemoglobin         | 12.8 ± 0.5                    | 12.0 ± 0.6                    |
| Red blood cell distribution         | 18.8 ± 0.4                    | 19.4 ± 0.4                    |
| Mean platelet volume                | 6.3 ± 0.1                     | 6.6 ± 0.1                     |
| Platelet distribution               | 31.4 ± 0.7                    | 31.7 ± 0.8                    |

Parameters are shown as mean ± SEM. \*, p<0.05 compared to Axl<sup>+/+</sup> (Student's *t* test).  
n, Number of mice.

**Table III.** Morphometry analyses of mesenteric arteries across experimental mice

| <b>Group</b>                                                    | <b>Parameter</b> | <b>Lumen area, x10<sup>3</sup><br/>μm<sup>2</sup></b> | <b>Media area,<br/>x10<sup>3</sup> μm<sup>2</sup></b> | <b>Adventitia area,<br/>x10<sup>3</sup> μm<sup>2</sup></b> |
|-----------------------------------------------------------------|------------------|-------------------------------------------------------|-------------------------------------------------------|------------------------------------------------------------|
| Ax1 <sup>+/+</sup> , n=5                                        |                  | 16.3 ± 2.4                                            | 7.2 ± 0.8                                             | 6.5 ± 0.8                                                  |
| PBS → Rag1 <sup>-/-</sup> , n=5                                 |                  | 10.7 ± 1.9                                            | 4.5 ± 0.6 *                                           | 4.1 ± 0.4 *                                                |
| CD4 <sup>+</sup> Ax1 <sup>+/+</sup> → Rag1 <sup>-/-</sup> , n=5 |                  | 12.7 ± 3.1                                            | 6.8 ± 0.9                                             | 6.0 ± 0.5                                                  |
| CD4 <sup>+</sup> Ax1 <sup>-/-</sup> → Rag1 <sup>-/-</sup> , n=6 |                  | 11.2 ± 1.9                                            | 3.8 ± 0.9 *,†                                         | 3.8 ± 0.8 *,†                                              |

Parameters are shown as mean ± SEM. \*, p<0.05 compared to Ax1<sup>+/+</sup> (ANOVA). †, p<0.05 compared to CD4<sup>+</sup> Ax1<sup>+/+</sup> → Rag1<sup>-/-</sup> (ANOVA). n, Number per group.

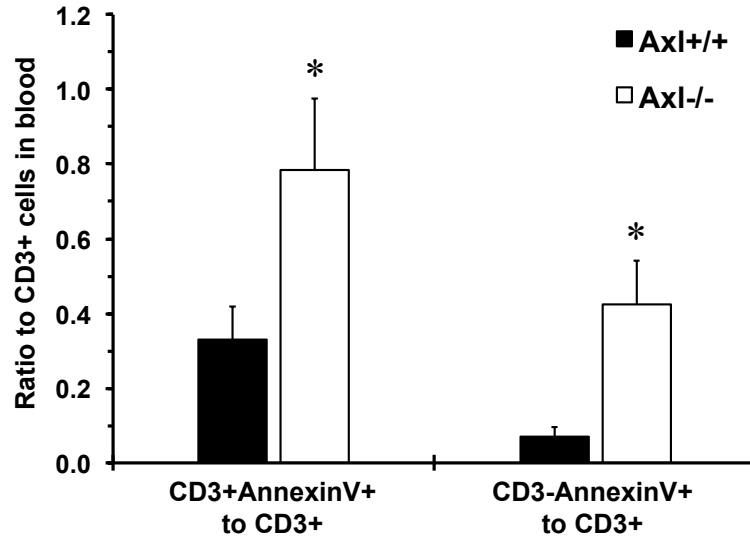

**Figure I. Increased lymphocyte apoptosis in peripheral blood from Axl knockout mice.** Relative numbers of CD3<sup>+</sup> or CD3<sup>-</sup> apoptotic (AnnexinV<sup>+</sup>) cells between Axl genotypes. Black bars represent Axl<sup>+/+</sup> mice. Open bars represent Axl<sup>-/-</sup> mice. Values are mean±SEM. \*, p<0.05 vs. Axl<sup>+/+</sup> (Student's *t* test). n=5

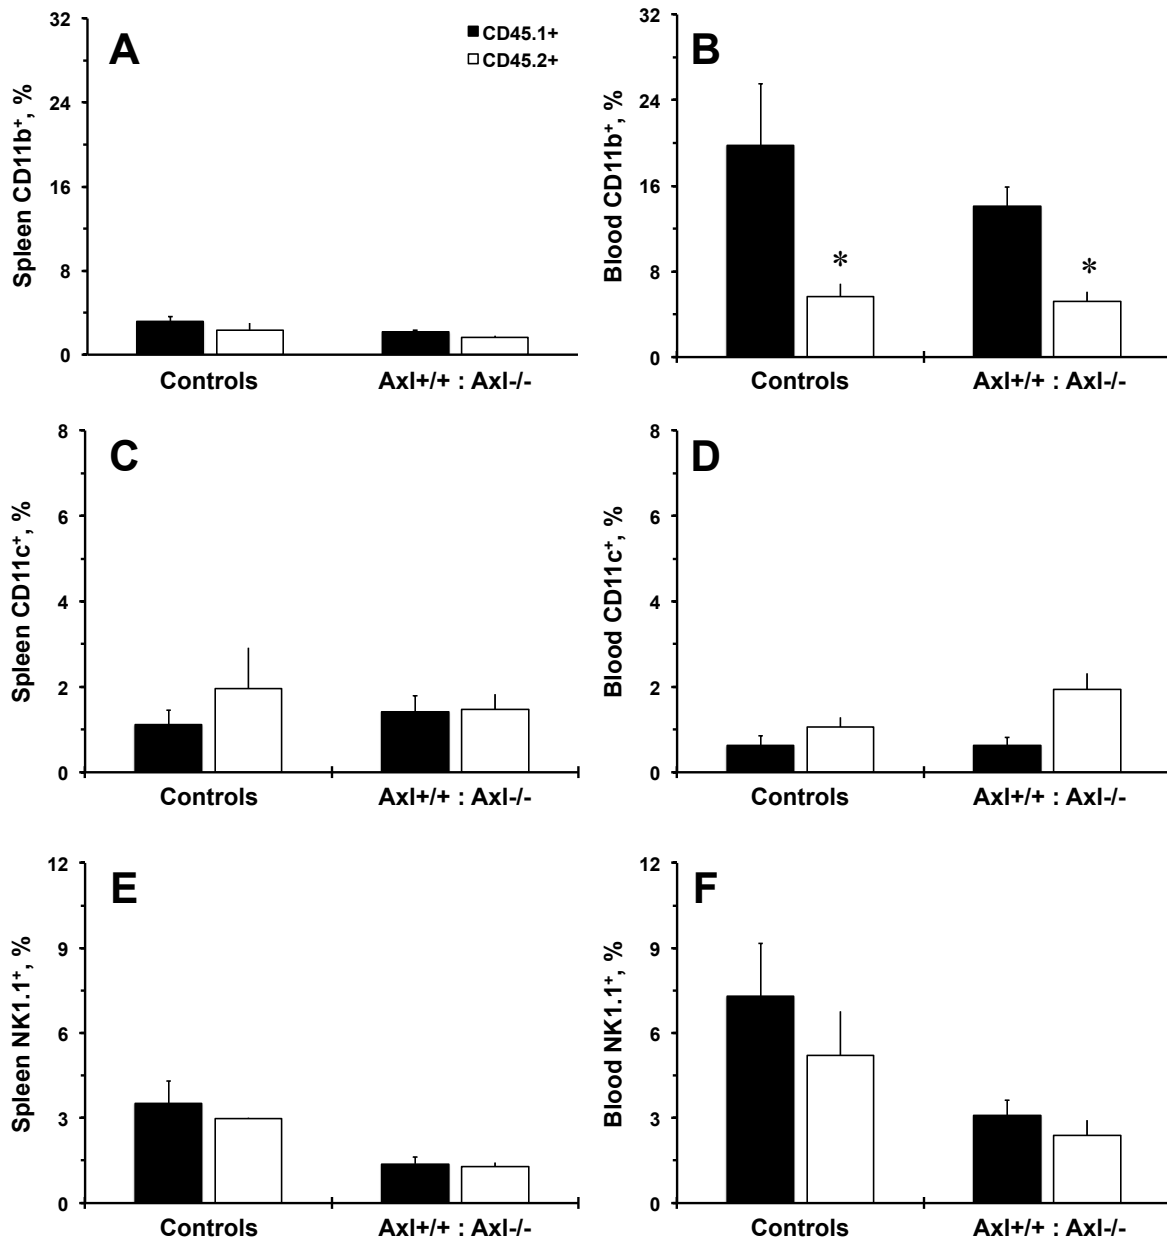

**Figure II. Effect of Axl deletion on competitive repopulation of the innate immune cells.** Competitive bone marrow cells repopulation experiment between Axl genotypes: Axl<sup>+/+</sup> (CD45.1<sup>+</sup>) and Axl<sup>-/-</sup> (CD45.2<sup>+</sup>) after 8 weeks after bone marrow transplant. **A.** Percentage of CD11b<sup>+</sup> cells in spleens. **B.** Percentage of CD11b<sup>+</sup> cells in blood. **C.** Percentage of CD11c<sup>+</sup> cells in spleens. **D.** Percentage of CD11c<sup>+</sup> cells in blood. **E.** Percentage of NK1.1<sup>+</sup> cells in spleens. **F.** Percentage of NK1.1<sup>+</sup> cells in blood. Black bars are Axl<sup>+/+</sup>. Open bars - Axl<sup>-/-</sup>. Values are mean±SEM. \*, p<0.05 vs. Axl<sup>+/+</sup>. n=4-10 per group

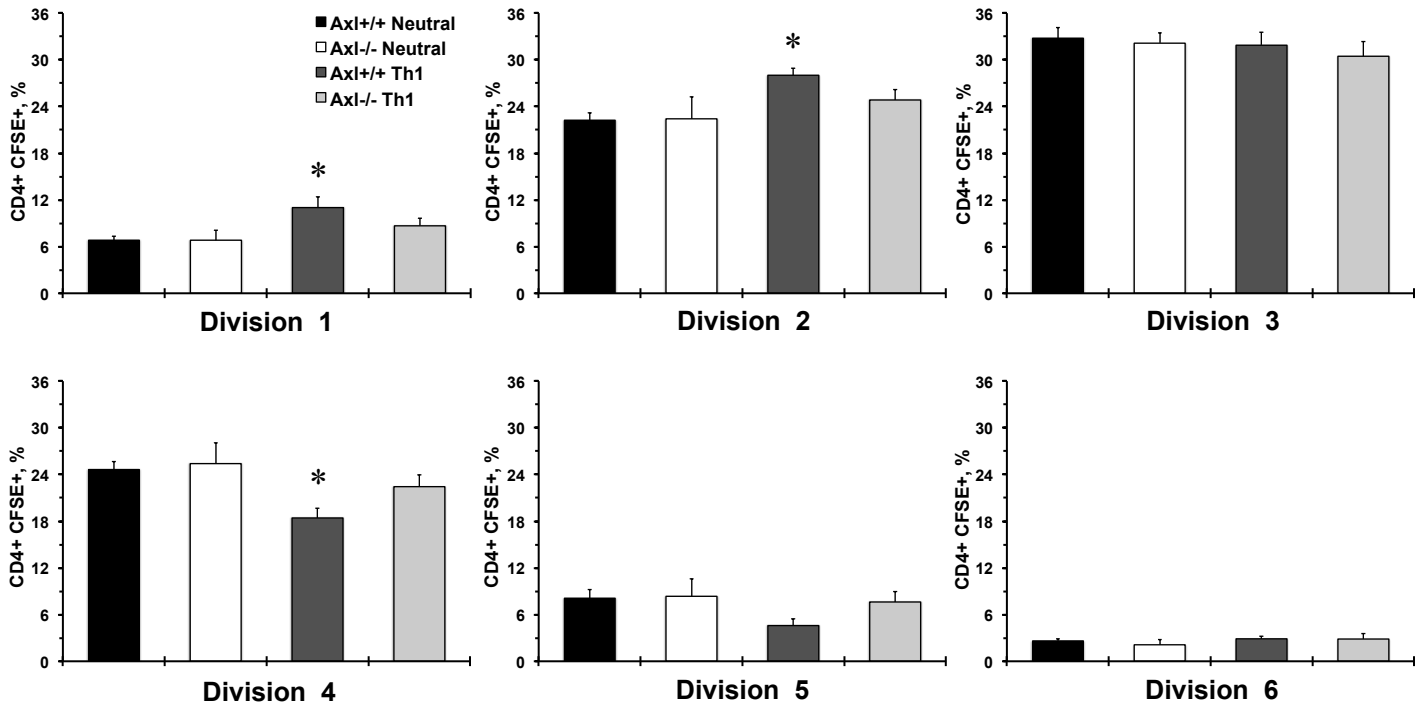

**Figure III. Quantification of the CD4<sup>+</sup>CFSE<sup>+</sup> cells under priming conditions.** Black bars represent Neutral Axl<sup>+/+</sup> cells. Open bars – Neutral Axl<sup>-/-</sup> cells. Dark grey bars – Axl<sup>+/+</sup> Th1 cells. Light grey bars – Axl<sup>-/-</sup> Th1 cells. Values are mean±SEM. \*, p<0.05 vs. Neutral Axl<sup>+/+</sup>. n=5

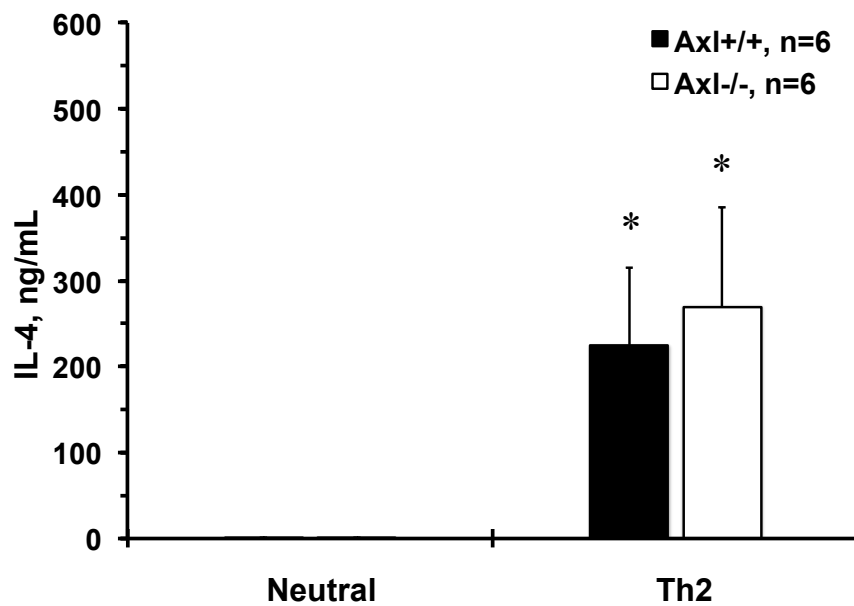

**Figure IV. Axl has no effect on Th2 polarization *in vitro*.** CD4<sup>+</sup> T cells from Axl mice were primed with Neutral or Th2 conditions for 5 days. Supernatants were assayed by ELISA Interleukin 4 (IL-4; ng/mL). Black bars are Axl<sup>+/+</sup>. Open bars - Axl<sup>-/-</sup>. Values are mean±SEM. \*, p<0.05 vs. Neutral conditions. n, number per group
